# Supplementary material for: A metal–phenolic coordination framework nanozyme exhibits dual enzyme mimicking activity and its application is effective for colorimetric detection of biomolecules
Source: Royal Society of Chemistry journal article supplement (doi:10.1039/d4ay00689e), 2024-01-01
Supplement: d4ay00689e1.pdf [file d4ay00689e1.pdf]

## **Metal-phenolic coordination frameworks nanozyme exhibits dual enzyme mimic activity and its application of effective colorimetric detection of biomolecules**

Aham Emmanuel Chigozie<sup>1,4#</sup>, A. Ravikumar<sup>1#</sup>, Xiaofeng Yang<sup>1</sup>, G. Tamilselvan<sup>1</sup>, Yibin Deng<sup>2,3\*</sup>, A. Arunjegan<sup>1</sup>, Xuesong Li<sup>1</sup>, Zhang Hu<sup>1</sup>, Zhen Zhang<sup>1,2,3\*</sup>

<sup>1</sup>School of the Environment and Safety Engineering, Jiangsu University, Zhenjiang 212013, China.

<sup>2</sup> Center for Medical Laboratory Science, the Affiliated Hospital of Youjiang Medical University for Nationalities, Baise 533000, China.

<sup>3</sup> Key Laboratory of Clinical Molecular Diagnosis and Research for High Incidence Diseases in Western Guangxi, Guangxi, 533000, China.

<sup>4</sup>Department of Biochemistry, Faculty of Biological Sciences, University of Nigeria, Nsukka, Nigeria.

\*Corresponding author:

Email: Email: [dengyb75@163.com](mailto:dengyb75@163.com); [zhangzhen@ujs.edu.cn](mailto:zhangzhen@ujs.edu.cn)

# These authors equally contributed this work.

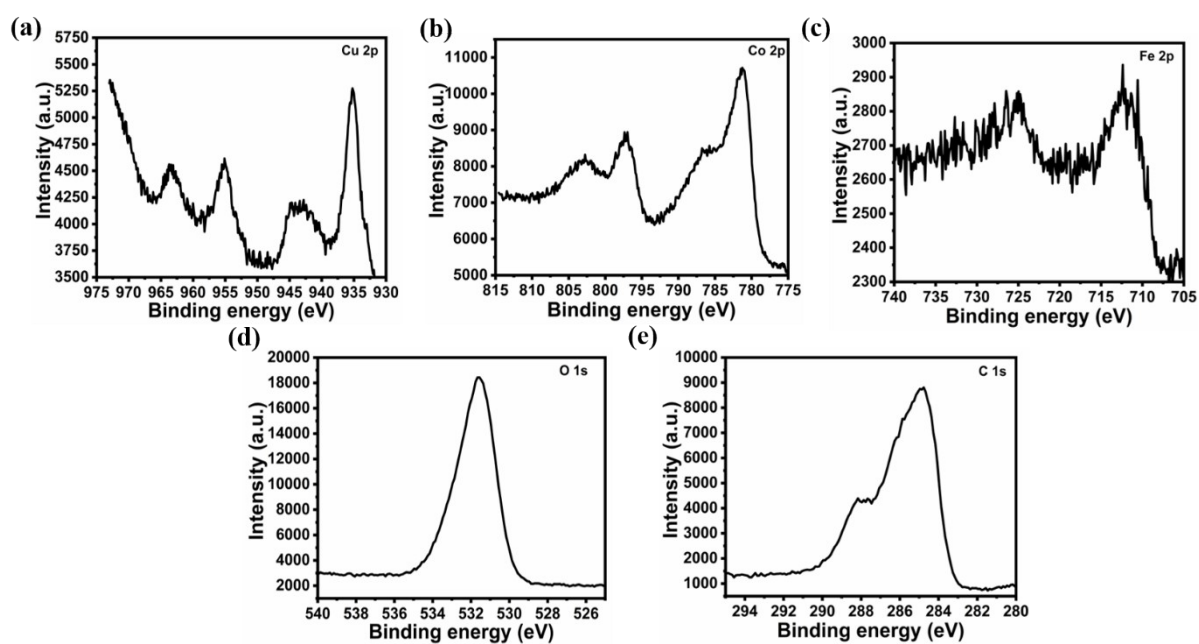

**Figure S1** High-resolution XPS spectra of nanozymes showing Cu 2p, Co 2p, Fe 2p, O 1s and C 1s core energy levels.

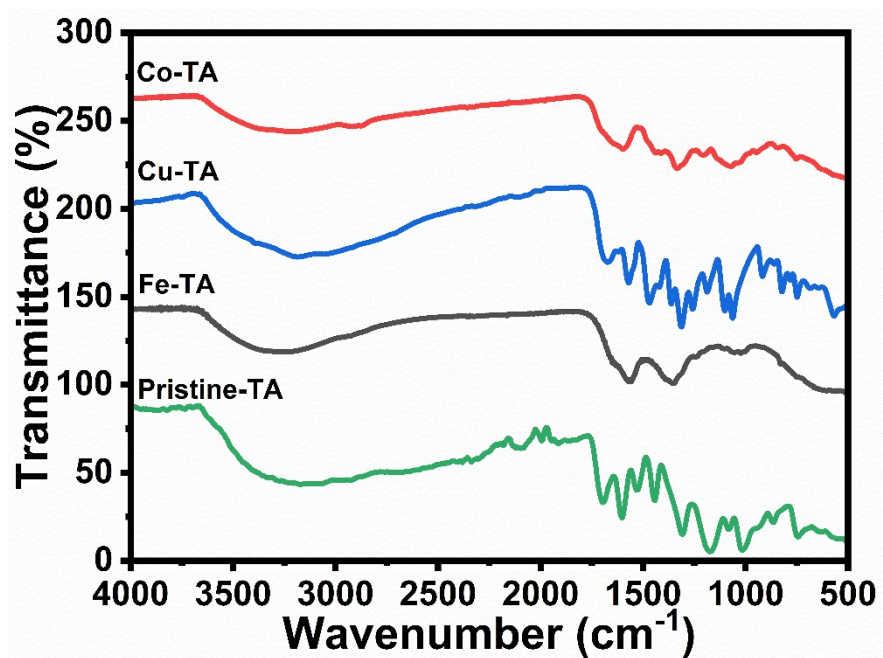

Figure S2 FT-IR spectra of Cu-TA, Co-TA, Fe-TA and Pristine-TA.

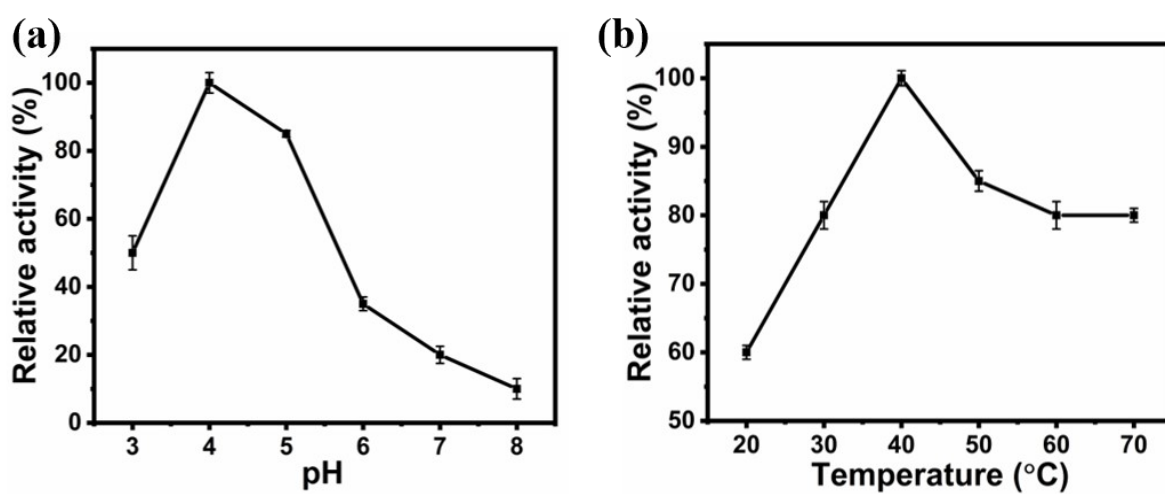

**Figure S3** The effect of (a) pH and (b) temperature of the peroxidase and catalase activity of Fe-TA nanozyme.

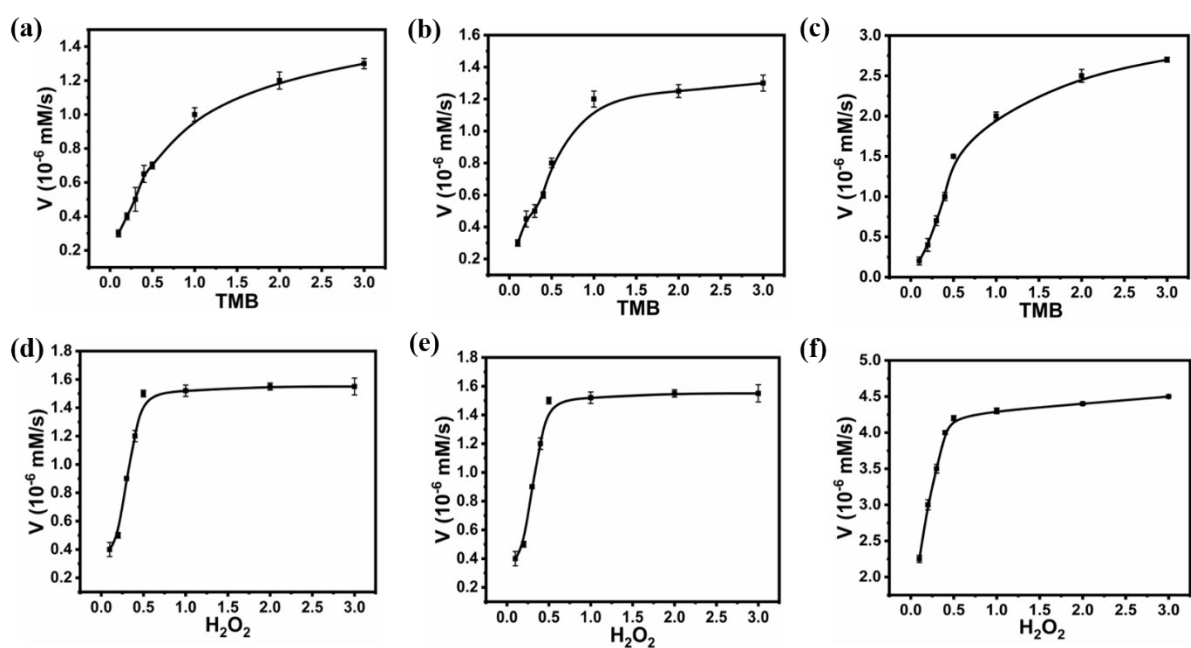

**Figure S4** The Michaelis-Menten curves for different peroxidase-like nanozymes using  $H_2O_2$  and TMB as substrates

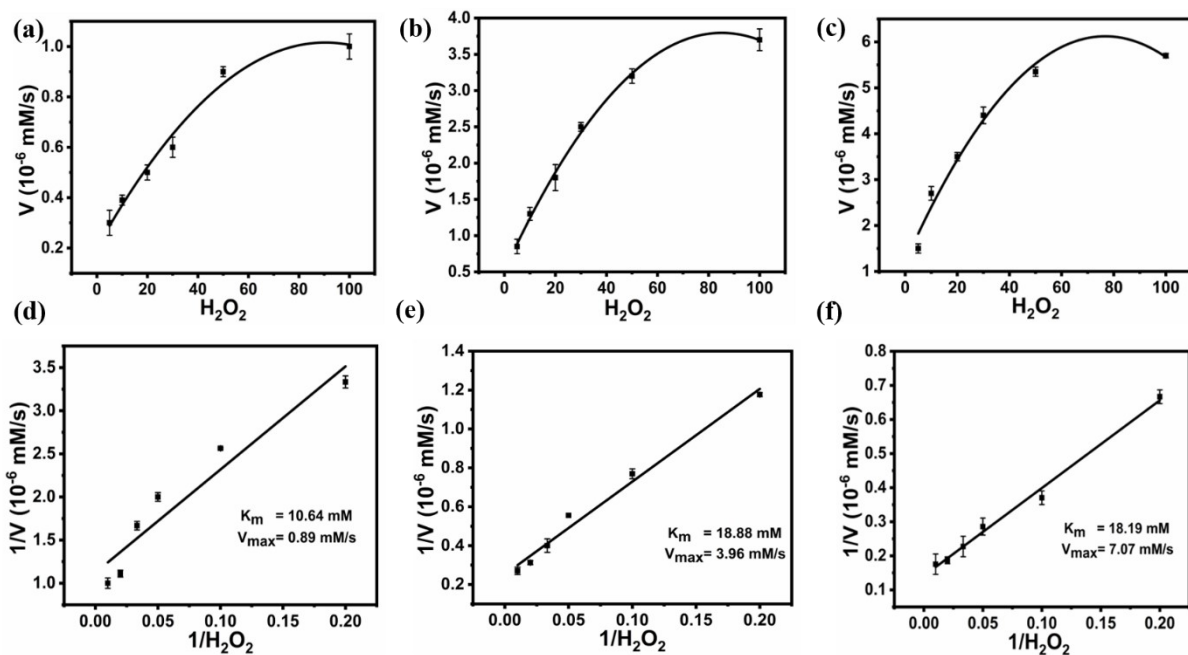

**Figure S5** The Michaelis-Menten curves and double reciprocal plots for various catalase-like activities of nanozymes.

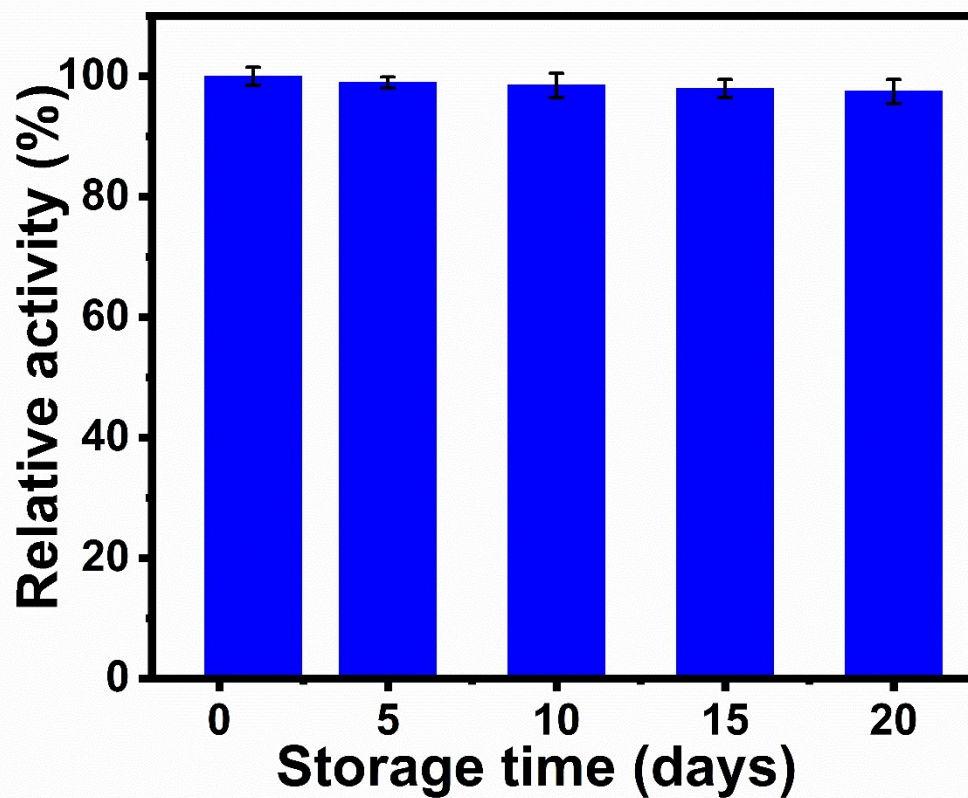

Figure S6 The remarkable stability of Fe-TA nanozyme after 21 days of storage.

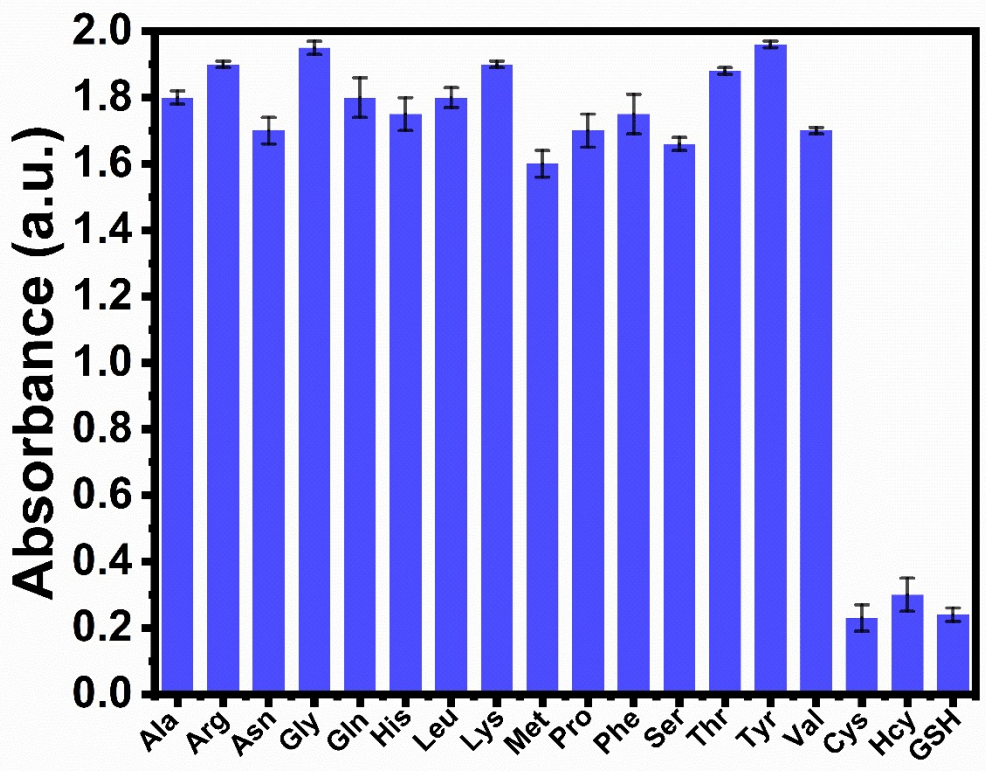

**Figure S7** Selectivity performance of Fe-TA nanozyme in detecting Cys, Hcy and GSH in the presence of other possible interfering biomolecules.



**Table S1** Comparison of the POD-like and CAT-like kinetic parameters of Cu-TA, Co-TA and Fe-TA nanozymes.

| <b>Enzyme mimic</b> | <b>MPNs</b> | <b>Substrate</b>              | <b>K<sub>m</sub> (mM)</b> | <b>V<sub>max</sub> (Ms<sup>-1</sup>)</b> |
|---------------------|-------------|-------------------------------|---------------------------|------------------------------------------|
| POD                 | Cu-TA       | H <sub>2</sub> O <sub>2</sub> | 0.261                     | 2.04                                     |
|                     |             | TMB                           | 0.306                     | 1.126                                    |
|                     | Co-TA       | H <sub>2</sub> O <sub>2</sub> | 0.497                     | 2.39                                     |
|                     |             | TMB                           | 0.248                     | 1.251                                    |
|                     | Fe-TA       | H <sub>2</sub> O <sub>2</sub> | 0.11                      | 4.76                                     |
|                     |             | TMB                           | 0.348                     | 1.651                                    |
| CAT                 | Cu-TA       | H <sub>2</sub> O <sub>2</sub> | 10.64                     | 0.89                                     |
|                     | Co-TA       | H <sub>2</sub> O <sub>2</sub> | 18.88                     | 3.96                                     |
|                     | Fe-TA       | H <sub>2</sub> O <sub>2</sub> | 18.19                     | 7.07                                     |

**Table S2** Comparison of the linear ranges and LOD of Cys, GSH, and Hcy with previous studies.

|            | <b>Materials</b>                            | <b>Method</b> | <b>Linear ranges (μM)</b> | <b>LODs (μM)</b> | <b>References</b> |
|------------|---------------------------------------------|---------------|---------------------------|------------------|-------------------|
| <b>Cys</b> | CeO <sub>2</sub> /CoO                       | Colorimetry   | 5-10                      | 3.71             | 1                 |
|            | CuMnO <sub>2</sub>                          | Colorimetry   | 20–300                    | 11.26            | 2                 |
|            | Pd–Fe <sub>3</sub> O <sub>4</sub> DBNPs     | Colorimetry   | 0-250                     | 3.1              | 3                 |
|            | Pt@WO <sub>3</sub> NSs                      | Colorimetry   | 0.01–15                   | 1.2              | 4                 |
|            | PdPt <sub>3</sub> -LNT NDs                  | Colorimetry   | 0–200                     | 3.099            | 5                 |
|            | Fe-TA                                       | Colorimetry   | 1-2                       | 0.382            | This study        |
| <b>Hcy</b> | AgNPRs                                      | Colorimetry   | 0-5                       | 0.041            | 6                 |
|            | CB-CQDs                                     | Colorimetry   | 0.5–20                    | 0.6              | 7                 |
|            | MnO <sub>2</sub> NFs-RhB                    | Colorimetry   | 0–30                      | 0.087            | 8                 |
|            | Fe <sup>3+</sup> - TMB                      | Colorimetry   | 2–24                      | 2.09             | 9                 |
|            | Fe <sub>3</sub> O <sub>4</sub> @CuO-GO      | Colorimetry   | 5–200                     | 1.8              | 10                |
|            | Fe-TA                                       | Colorimetry   | 2-3                       | 0.776            | This study        |
| <b>GSH</b> | Hemin/GQD                                   | Colorimetry   | 1-50                      | 200              | 11                |
|            | Pd150-PCRPs NPs                             | Colorimetry   | 2–300                     | 1.65             | 12                |
|            | Fe <sub>3</sub> O <sub>4</sub> /CNDs        | Colorimetry   | 0–20                      | 0.058            | 13                |
|            | PCN-224-Mn                                  | Colorimetry   | 0.5-60                    | 0.233            | 14                |
|            | Mn <sub>3</sub> O <sub>4</sub> microspheres | Colorimetry   | 5–60                      | 0.889            | 15                |
|            | Fe-TA                                       | Colorimetry   | 2-9                       | 0.750            | This study        |

**Table S3** The performance of Fe-TA colorimetric sensor in spiked real water samples. (n=3)

| Targets | Samples     | Spiked ( $\mu\text{M}$ ) | Found ( $\mu\text{M}$ ) | Recovery $\pm$ RSD (%) |
|---------|-------------|--------------------------|-------------------------|------------------------|
| Cys     | Tap water   | 5                        | 5.12                    | 102.4 $\pm$ 2.24       |
|         | River water | 10                       | 10.13                   | 101.3 $\pm$ 3.84       |
|         | Lake water  | 15                       | 14.9                    | 99.3 $\pm$ 4.02        |
| Hcy     | Tap water   | 5                        | 4.97                    | 99.4 $\pm$ 1.27        |
|         | River water | 10                       | 9.9                     | 99 $\pm$ 5.12          |
|         | Lake water  | 15                       | 14.95                   | 99.7 $\pm$ 6.1         |
| GSH     | Tap water   | 5                        | 5.02                    | 100.4 $\pm$ 1.98       |
|         | River water | 10                       | 9.93                    | 99.3 $\pm$ 3.14        |
|         | Lake water  | 15                       | 15.2                    | 101 $\pm$ 3.55         |

## REFERENCES

- 1 J. Lian, P. Liu, C. Jin, Q. Y. Liu, X. Zhang and X. Zhang, *ACS Sustainable Chemistry and Engineering*, 2020, **8**, 17540–17550.
- 2 Y. Chen, T. Chen, X. Wu and G. Yang, *Sensors and Actuators B: Chemical*, 2019, **279**, 374–384.
- 3 W. Duan, Z. Qiu, S. Cao, Q. Guo, J. Huang, J. Xing, X. Lu and J. Zeng, *Biosensors and Bioelectronics*, 2022, **196**, 113724.
- 4 A. Alaei, M. Hosseini, F. Nemati and H. Karimi-Maleh, *Environmental Research*, 2022, **212**, 113246.
- 5 Z. Ma, L. Dong, B. Zhang, B. Liang, L. Wang, G. Ma and L. Wang, *International journal of biological macromolecules*, 2022, **216**, 779–788.
- 6 P. Li, S. M. Lee, H. Y. Kim, S. Kim, S. Park, K. S. Park and H. G. Park, *Scientific Reports 2021 11:1*, 2021, **11**, 1–8.

- 7 C. Yuan, X. Qin, Y. Xu, X. Li, Y. Chen, R. Shi and Y. Wang, *Journal of Photochemistry and Photobiology A: Chemistry*, 2020, **396**, 112529.
- 8 H. Xue, M. Yu, K. He, Y. Liu, Y. Cao, Y. Shui, J. Li, M. Farooq and L. Wang, *Analytica Chimica Acta*, 2020, **1127**, 39–48.
- 9 M. Lin, Y. Guo, Z. Liang, X. Zhao, J. Chen and Y. Wang, *Microchemical Journal*, 2019, **147**, 319–323.
- 10 Z. Song, C. Jiang, F. Wang, L. Yu, S. Ye, P. Dramou and H. He, *Microchimica Acta*, 2021, **188**, 1–10.
- 11 Z. Li, X. Deng, X. Hong and S. Zhao, *Molecules* 2022, Vol. 27, Page 6779, 2022, **27**, 6779.
- 12 S. Li, Y. Zhao, F. Ji, R. Zheng, X. Ji, Z. Liu and L. Wang, *Colloids and Surfaces A: Physicochemical and Engineering Aspects*, 2022, **650**, 129617.
- 13 N. Luo, Z. Yang, F. Tang, D. Wang, M. Feng, X. Liao and X. Yang, *ACS Applied Nano Materials*, 2019, **2**, 3951–3959.
- 14 X. Lai, Y. Shen, S. Gao, Y. Chen, Y. Cui, D. Ning, X. Ji, Z. Liu and L. Wang, *Biosensors and Bioelectronics*, 2022, **213**, 114446.
- 15 J. Xi, C. Zhu, Y. Wang, Q. Zhang and L. Fan, *RSC Advances*, 2019, **9**, 16509–16514.
